# Supplementary material
Source: Springer Nature journal article supplement (https://www.springermedizin.de/resource/supplementary/12936_2013_3180_MOESM4_ESM.pdf/9545180)
Supplement: MOESM4 [file 9545180]

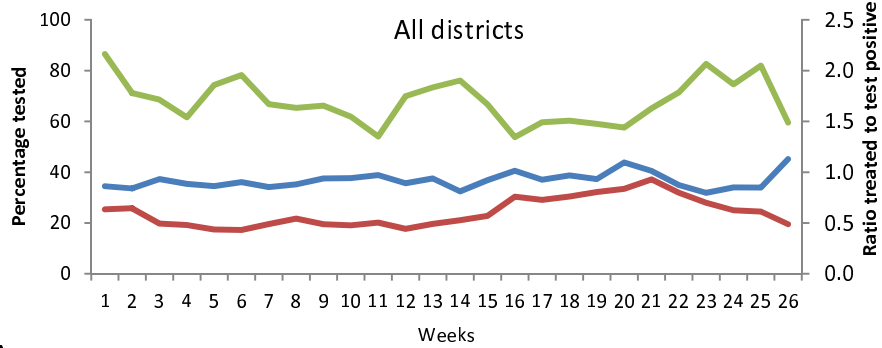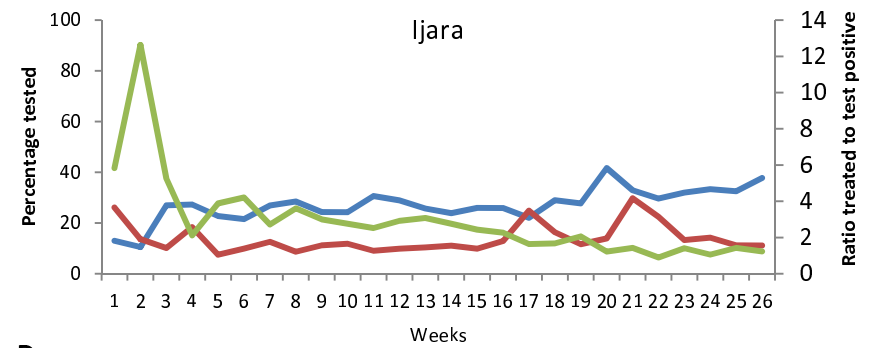

**A** Testing rate Test positivity rate Ratio treated to test positive

**D** Testing rate Test positivity rate Ratio treated to test positive

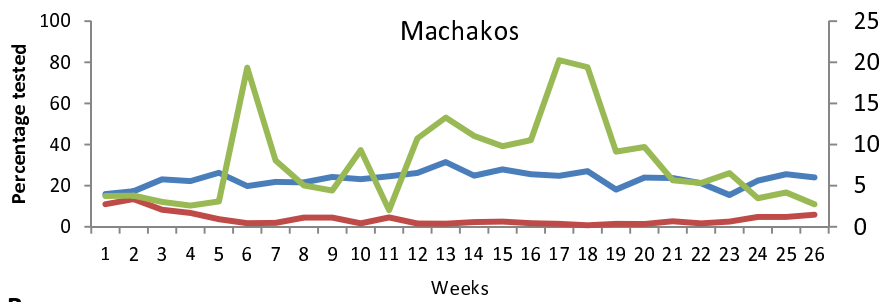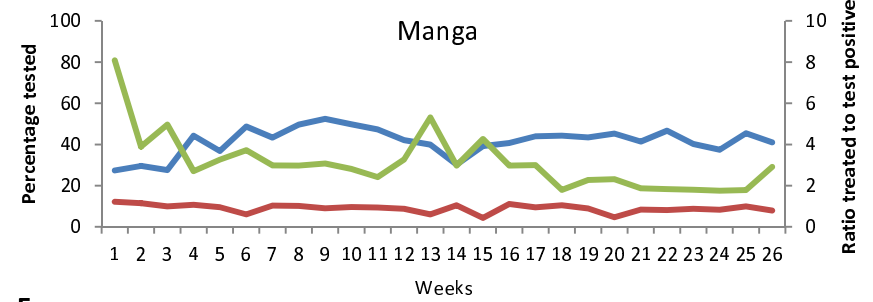

**B** Testing rate Test positivity rate Ratio treated to test positive

**E** Testing rate Test positivity rate Ratio treated to test positive

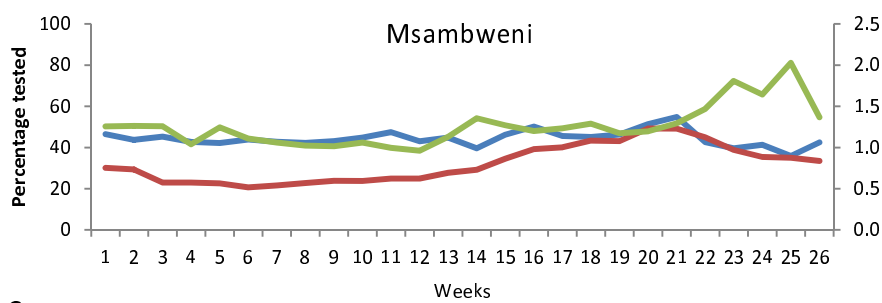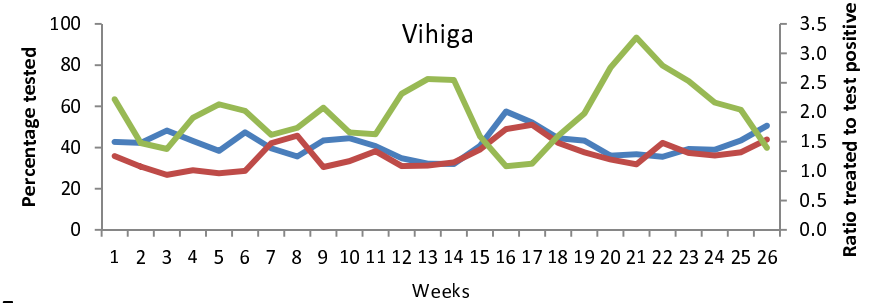

**C** Testing rate Test positivity rate Ratio treated to test positive

**F** Testing rate Test positivity rate Ratio treated to test positive
